# Supplementary material for: From spiral cleavage to bilateral symmetry: the developmental cell lineage of the annelid brain
Source: BMC Biol. 2019 Oct 22;17:81. doi: 10.1186/s12915-019-0705-x (PMC6805352; doi:10.1186/s12915-019-0705-x)
Supplement: Supplementary file 1 — Additional file 1. The ImageJ/FIJI macro package for visualization of the lineages using the tracking data and the lineage movies. The macro package allows visualizing the track on top of the lineage movies, finding a given cell by the lineage name or the reference ID name, changing colors of a given cell, its descendants and/or ancestors. Documentation is provided in Additional file 2. [file 12915_2019_705_MOESM1_ESM.ijm]

/* 
 ImageJ macro package for visualizing
 and working with Platynereis cell lineage.
 Contains 6 macro tools:
 1) LinView - a macro for visualizing the lineage on top  of the movie. A 3D-time-lapse stack or its Z-projection
 needs to be opened.
 Input: a trackfile in .txt format (csv)
To select a cell, hold "alt" and left-click on a given cell track.

Macros 2-5 work once a track is loaded onto a movie using LinView:
 
 2) Cell name - if a "cell" selected, shows its lineage name, custom name and actual coordinates.
 
 3) Find a cell - a tool for finding a "cell" could be found based on the lineage name or based on the reference ID name (rID) or custom name with frame.
 
 4) Label a cell - a tool for labeling a cell, all its offsprings or ancestors with a selected color.
 Requires either a cell to be selected or a lineage name. In the lineage name "1m-" could be put instead of "1a-", "1b-"
 ...etc to label all 1abcd homologues from spiralian nomenclature.
 
 5) Draw tree - a macro for creating the lineage tree from a track file. 
 Input: a trackfile.txt created by LinTrk
 Output: .svg files in the folder of the trackfile. As many as there are independent track in the trackfile.
 
 Created 2014 by Pavel Vopalensky, vopalens@embl.de
  */

//Defining color palletes and default color for all the tools
var colarray = newArray("black","gray","white","purple","fuchsia","pink","blue","aqua","light blue","green","lime","light green","maroon","red","rosa","brown","yellow","sand","orange","teal","silver","transparent");
var colcodearay = newArray("#000000","#808080","#FFFFFF","#800080","#FF00FF","#FF8BDE","#0000FF","#00FFFF","#8BCFFF","#008000","#00FF00","#8BFFC2","#800000","#FF0000","#E9967A","#DAA520","#FFFF00","#FFE68B","#FF6900","#008080","#C0C0C0","#00000000");
var defcolor = "yellow"; 


macro "Lineage Viewer Action Tool - C00f7T0807LT6807iTa807nT0f07VT5f07iT8f07eTcf07w" {
	
	Dialog.create("Lineage Viewer");
	Dialog.addNumber("\t\tCircle size", 6);
	Dialog.addNumber("\t\tFrame shift", 0);
	Dialog.addMessage("----------------------------------");
	Dialog.addCheckbox("Label cells uniformly with selected color:", 0);
	Dialog.addRadioButtonGroup("", colarray, 10, 4, defcolor);
 	Dialog.show();
 	ovalrad = Dialog.getNumber();
	frameshift = Dialog.getNumber();
	showids=0;
	whattoshow=1;
	
	unilabel=Dialog.getCheckbox();
	selectedColor = Dialog.getRadioButton();
	selectedColorInd = arrindex (colarray, selectedColor);
	selectedColorCode = colcodearay[selectedColorInd];
	Overlay.remove;
	getDimensions(imwidth, imheight, imchannels, imslices, imframes);
	showmiddlelines = 0;
	savechain = "";
	pathfile=File.openDialog("Choose the XYZ file to Open:");
	filestring=File.openAsString(pathfile);
	lines = split(filestring, "\n");
	nrlines = lengthOf(lines);
	subclonename = "";
	branchstring = "";
	oversize = 0;
	lettercode = 0;
	setBatchMode(true);
	Overlay.hide;
	for (i = 0; i<nrlines; ++i) {//reading the track file
		linefield = split (lines[i], ",");
	
		if (linefield[0] == "Branch"){
			subclonename = linefield[1];
			colorcode = linefield[4];
			cusname = linefield[3];
			branchstring = branchstring+cusname+"@";
		}

		if (unilabel==1) {
			colorcode=selectedColorCode;
		}
	
		if (linefield[0] == subclonename){
			x = parseInt(linefield[1]);
			y = parseInt(linefield[2]);
			z = parseInt(linefield[3]);
			t = parseInt(linefield[4]);
	
			if (imslices == 1 && (t-frameshift)>0 ) {
				makeOval(x-ovalrad/2, y-ovalrad/2, ovalrad, ovalrad);
				setSelectionName(subclonename+"#"+z+"#"+cusname);
				Overlay.addSelection("", 0, colorcode);
				Overlay.setPosition(t-frameshift);
				showids = 0;//show the IDs
				whattoshow = 0;//show the cusname
				//whattoshow = 1;//show the lineage name
				fontsize=10;
				setFont("SansSerif", fontsize);
				if (showids == 1 && whattoshow == 0) {
					Overlay.drawString(cusname, x+ovalrad/4, y+ovalrad/4, 0);
				}
				
				if (showids == 1 && whattoshow == 1) {
					Overlay.drawString(subclonename, x+ovalrad/4, y+ovalrad/4, 0);
				}

				if (showmiddlelines==1 && startsWith(subclonename,"Middle")) {

					makeLine(x,1,x,460);
					setSelectionName("DVMiddleline#1DVMiddleline-1");
					Overlay.addSelection("", 0, colorcode);
					Overlay.setPosition(t-frameshift);
					makeLine(1,y,460,y);
					setSelectionName("LRMiddleline#1LRMiddleline-1");
					Overlay.addSelection("", 0, colorcode);
					Overlay.setPosition(t-frameshift);
			
				}
				
				Overlay.setPosition(t-frameshift);
			}
			
			if (imslices > 1 && (t-frameshift)>0 ) {
				makeOval(x-ovalrad/2, y-ovalrad/2, ovalrad, ovalrad);
				setSelectionName(subclonename+"#"+z+"#"+cusname);
				Overlay.addSelection("", 0, colorcode);
				Overlay.setPosition(1,z,t-frameshift);

				/// puting a smaler dot above and below the main tracking circle
				setLineWidth(1);
				setColor(colorcode);
				if ((z-1)>0) {
					Overlay.drawEllipse(x-round(ovalrad/2)/2, y-round(ovalrad/2)/2, round(ovalrad/2), round(ovalrad/2));
					Overlay.setPosition(1,z-1,t-frameshift);
				} else {
					Overlay.drawEllipse(x-round(ovalrad/2)/2, y-round(ovalrad/2)/2, round(ovalrad/2), round(ovalrad/2));
					Overlay.setPosition(1,z,t-frameshift);
				}			
				if ((z+1)<imslices) {
					Overlay.drawEllipse(x-round(ovalrad/2)/2, y-round(ovalrad/2)/2, round(ovalrad/2), round(ovalrad/2));
					Overlay.setPosition(1,z+1,t-frameshift);
				} else {
					Overlay.drawEllipse(x-round(ovalrad/2)/2, y-round(ovalrad/2)/2, round(ovalrad/2), round(ovalrad/2));
					Overlay.setPosition(1,z,t-frameshift);
				}

			}
		}
		progress = (i+1)/nrlines;
		showProgress(progress);
		run("Select None");
	} //end of for - reading the track file
	
	Overlay.show;
	setBatchMode(false);
  
}//###### End of Lineage Viewer Macro

macro "Get Cell Name Action Tool - C00f7T0807CT6807eTa807lTd807lT0f07nT5f07aT9f07mTef07e" {//11AT7 - th A is the one,
	if (getInfo("selection.name") != "") {
		toshow = getInfo("selection.name");
		toshowarr = split(toshow, "#");
		linshow = toshowarr[0];
		zshow = toshowarr[1];
		cusshow = toshowarr[2];
		getSelectionBounds(x, y, width, height);
		Stack.getPosition(channel, slice, frame)
		print ("#######\n"+cusshow+"\n"+linshow+"\nx: "+(x+width/2)+" y: "+(y+height/2)+" z: "+zshow+" t: "+frame);
		showStatus("Custom name: "+cusshow+"  Lineage name: "+linshow);
	} else {
		showMessage("Get cell name", "    Select a cell first!    \n \n    (ALT + Left click)");
		}

}//###### End of macro "Get cell Name"

macro "Find a Cell by Name Action Tool - C00f7T0807FT5807iT8807nTd807dT0f07aT5f07cT9f07eTdf07lTff07l" {

	Dialog.create("Find a cell");
		Dialog.addMessage("	Specify a cell to pick up:");
		Dialog.addString("                   ", "NA");
		findbywhat = newArray("reference rID  (eg r358)","lineage name  (eg 1b-211)");
		Dialog.addRadioButtonGroup("              Find a cell by:\n", findbywhat, 2, 1, "reference rID  (eg r358)");
 	Dialog.show();
	pickedcell = Dialog.getString();
	radbuttonvalue1 = Dialog.getRadioButton;
	findbynumber = arrindex(findbywhat, radbuttonvalue1);//0=by rID, 2=lineage
	oversize = Overlay.size;
	p = 0;
	found = 0;
	setBatchMode("hide");
	while (found == 0 && p<oversize) {
		Overlay.activateSelection(p);
		searched=getInfo("selection.name");

		if (findbynumber == 0 && matches(searched, ".*#"+pickedcell+"-[0-9]+")) {	
			Overlay.activateSelection(p);
			getSelectionBounds(x, y, width, height);
			showStatus("Found: "+pickedcell+" x"+x+" y"+y);
			found = 1;	
		}//end of if findbynumber = 1
	
		if (findbynumber == 1 && startsWith(searched, pickedcell+"#")) {	
			Overlay.activateSelection(p);
			getSelectionBounds(x, y, width, height);
			showStatus("Found: "+pickedcell+" x"+x+" y"+y);
			found = 1;		
		}//end of if findbynumber = 2
		
		p=p+1;	
	}//end of while
	setBatchMode("show");

	if (found == 1) {
		print ("Cell "+pickedcell+" found:");
		stringarr = split(searched,"#");
		print (stringarr[0]);
		print (stringarr[2]);
		print ("x "+x+" y "+y+" z "+stringarr[1]);	
	}
	
	if (found == 0){
		showStatus("NOT FOUND: "+pickedcell);
		showMessage("Looking for a cell", "Cell called "+pickedcell+" not found");
	}

}//###### End of macro "Find a cell by name"


macro "Labeling tool Action Tool - C00f7T0807LT4807aT8807bTc807eTf807lT0f07aT5f07cT9f07eTdf07lTff07l" {

	Stack.getPosition(channelOfSelection, sliceOfSelection, FrameOfSelection);//to remember and set the same at the end
	selectedcellwithframe = getInfo("selection.name");
	
	if (selectedcellwithframe != "") {
		selectedcellarr = split(selectedcellwithframe,"#");
		selectedcell = 	selectedcellarr[0];
		selectedcellcusname = selectedcellarr[2];
		
		Dialog.create("Labeling tool");
			Dialog.addMessage("\tSelected cell lineage: "+selectedcell);
			Dialog.addMessage("\tSelected cell name-frame: "+selectedcellcusname);
			Dialog.addCheckbox("\tLabel selected cell", 1);
			Dialog.addCheckbox("\tLabel the ancestor", 0);
			Dialog.addCheckbox("\tLabel the offspring", 1);
			Dialog.addRadioButtonGroup("Highlight color:\n", colarray, 10, 4, defcolor);
		 	Dialog.show();

	 	labCellOnly = Dialog.getCheckbox();
		labAncestor = Dialog.getCheckbox();
		labOffspring = Dialog.getCheckbox();
		selectedColor = Dialog.getRadioButton();
		selectedColorInd = arrindex (colarray, selectedColor);
		selectedColorCode = colcodearay[selectedColorInd];
	
		indarr = newArray();
		oversize = Overlay.size;	
		setBatchMode(true);
		setBatchMode("hide");
		Overlay.hide;
	
		for (i = 0; i<oversize; i = ++i) {
			setBatchMode(true);
			Overlay.hide;
			Overlay.activateSelection(i);
			name = getInfo("selection.name");
			selectionnamearr = split(name,"#");
			if (lengthOf(selectionnamearr)>0) {
				selectionlineage = selectionnamearr[0];	
			} else {
				selectionlineage="Label";
			}
			SelOnIndArr = 0;
			
			if (labOffspring == 1 && startsWith(name, selectedcell)) {	
				Overlay.addSelection("", 0, selectedColorCode);	
				setSelectionName(name);
				indarr = Array.concat(indarr,i);
				SelOnIndArr = 1;
			}//end of if Start
			
			if (labCellOnly == 1 && startsWith(name, selectedcell+"#")) {	
				Overlay.addSelection("", 0, selectedColorCode);	
				setSelectionName(name);
				if (SelOnIndArr == 0) {
				indarr = Array.concat(indarr,i);
				SelOnIndArr = 1;
				}
			}//end of if Start

						
			if (labAncestor == 1 && startsWith(selectedcell, selectionlineage)) {	
				Overlay.addSelection("", 0, selectedColorCode);	
				setSelectionName(name);
				if (SelOnIndArr == 0) {
				indarr = Array.concat(indarr,i);
				}
			}//end of if Start
		
			
			progress = (i+1)/oversize;
			showProgress(progress);
		}//end of for looking in th array
	
		//deleting the guys who were replaced
		Array.sort(indarr);
		sizeindarr = lengthOf(indarr);
		for (rem = 0; rem <sizeindarr; ++rem) {
			torem = parseInt(indarr[rem]);
			Overlay.removeSelection(torem-rem);	//torem-rem because removing one shifts the numbers of all the next ones -1
			}//end of for - removing
		run("Select None");
		setBatchMode("show");
		Stack.setPosition(channelOfSelection, sliceOfSelection, FrameOfSelection);
		Overlay.show;
	}  else {
		selectedstring = "NA";
		Dialog.create("Labeling tool");
		Dialog.addString("\tLineage name:",selectedstring);
		Dialog.addMessage("\nUse 1m-... to label the quadroradial \nhomologues (eg 1m-1122)");
		Dialog.addCheckbox("\tLabel selected cell only", 1);
		Dialog.addCheckbox("\tLabel the ancestor", 0);
		Dialog.addCheckbox("\tLabel the offspring", 1);
		Dialog.addRadioButtonGroup("Highlight color:\n", colarray, 10, 4, defcolor);
	 	Dialog.show();
	 	selectedcell = Dialog.getString();
	 	labCellOnly = Dialog.getCheckbox();
		labAncestor = Dialog.getCheckbox();
		labOffspring = Dialog.getCheckbox();
		selectedColor = Dialog.getRadioButton();
		selectedColorInd = arrindex (colarray, selectedColor);
		selectedColorCode = colcodearay[selectedColorInd];
		
		if (startsWith(selectedcell,"1m")) {
			degenerate =1;
			searcha = replace(selectedcell,"1m","1a");
			searchb = replace(selectedcell,"1m","1b");
			searchc = replace(selectedcell,"1m","1c");
			searchd = replace(selectedcell,"1m","1d");
		} else {
			searcha = selectedcell;
			searchb = searcha;
			searchc = searcha;
			searchd = searcha;
		}
		
	
		indarr = newArray();
		oversize = Overlay.size;
		setBatchMode(true);
		setBatchMode("hide");
		Overlay.hide;
	
		for (i = 0; i<oversize; i = ++i) {
			setBatchMode(true);
			Overlay.hide;
			Overlay.activateSelection(i);
			name = getInfo("selection.name");
			selectionnamearr = split(name,"#");
			if (lengthOf(selectionnamearr)>0) {
				selectionlineage = selectionnamearr[0];	
			} else {
				selectionlineage="Label";
			}
			SelOnIndArr = 0;
			
			if (labOffspring == 1 && startsWith(name, searcha)|| startsWith(name, searchb) || startsWith(name, searchc) || startsWith(name, searchd)) {	
				Overlay.addSelection("", 0, selectedColorCode);	
				setSelectionName(name);
				indarr = Array.concat(indarr,i);
				SelOnIndArr = 1;
			}
			
			if (labCellOnly == 1 && startsWith(name, searcha+"#")|| startsWith(name, searchb+"#") || startsWith(name, searchc+"#") || startsWith(name, searchd+"#")) {	
				Overlay.addSelection("", 0, selectedColorCode);	
				setSelectionName(name);
				if (SelOnIndArr == 0) {
					indarr = Array.concat(indarr,i);
					SelOnIndArr = 1;
				}
			}
		
			if (labAncestor == 1 && startsWith(searcha, selectionlineage) || startsWith(searchb, selectionlineage)|| startsWith(searchc, selectionlineage)|| startsWith(searchd, selectionlineage)) {	
				Overlay.addSelection("", 0, selectedColorCode);	
				setSelectionName(name);
				if (SelOnIndArr == 0) {
					indarr = Array.concat(indarr,i);
				}
			}
		
			
			progress = (i+1)/oversize;
			showProgress(progress);
		}//end of for looking in th array
	
		//deleting the guys who were replaced
		Array.sort(indarr);
		sizeindarr = lengthOf(indarr);
		for (rem = 0; rem <sizeindarr; ++rem) {
			torem = parseInt(indarr[rem]);
			Overlay.removeSelection(torem-rem);	//torem-rem because removing one shifts the numbers of all the next ones -1
		}//end of for - removing
		run("Select None");
		setBatchMode("show");
		Stack.setPosition(channelOfSelection, sliceOfSelection, FrameOfSelection);
		Overlay.show;
		
	}

}

macro "Draw Tree Action Tool - C9397T0807DT6807rTa807aTd807wT2f07tT6f07rT9f07eTdf07e" {//11AT7 - th A is the one,
	
	print("\\Clear");
	pathfile=File.openDialog("Choose the XYZ Track file to Open:");
	filestring=File.openAsString(pathfile);
	path = File.directory;
	filname = File.getName(pathfile);
	shortfilname=replace(filname,".txt","");
	lines = split(filestring, "\n");
	nrlines = lengthOf(lines);
	
	brancharray = newArray();
	urparent = "";
	treechain = "";
	tobedone = "";
	thesametree = 0;
	maximumframe = 0;
	datestring = crDateString();
	
	for (i=0; i<nrlines; ++i) {
	
		if (startsWith(lines[i], "Branch") && !startsWith(lines[i],"Branch,Middle")){
			
			fields = split(lines[i], ",");
			realname = fields[1];
			cusname = fields[3];
			color = fields[4];
			subarr = realname+","+cusname;
			branchstarted = 1;
		}
		if (branchstarted == 1 && i+1==nrlines) {
			lastcoordarr = split(lines[i],",");
			lastframe = lastcoordarr[4];
			if (parseInt(lastframe) >= maximumframe) {
				maximumframe = parseInt(lastframe);
			}
			subarr = realname+","+cusname+","+lastframe+","+color;
			brancharray =  Array.concat(brancharray,subarr);
			branchstarted = 0;
	
		}
		
		if (branchstarted == 1 && i+1<nrlines) {
			if (startsWith(lines[i+1], "Branch")) {
			lastcoordarr = split(lines[i],",");
			lastframe = lastcoordarr[4];
			if (parseInt(lastframe) >= maximumframe) {
				maximumframe = parseInt(lastframe);
			}
			subarr = realname+","+cusname+","+lastframe+","+color;
			brancharray =  Array.concat(brancharray,subarr);
			branchstarted = 0;
			}
		}
	//print (lines[i]);		
	//print (maximumframe);
	}//done extracting just the lines with branches
	
	untilwhen = -1;
	treeitems = newArray("HL tree","12/ab tree");
	Dialog.create("Creating lineage trees from trackfile:");
	
	  	Dialog.addNumber("Until  frame:",maximumframe);
	  	Dialog.addNumber("Frame rate:",1);
	  	Dialog.addRadioButtonGroup("Which kind of tree?", treeitems, 2, 1, "HL tree")
		Dialog.addCheckbox("Print header", 1);
		Dialog.addCheckbox("Print footer", 1);
		Dialog.show();
		untilwhen=Dialog.getNumber();
		framefactor=Dialog.getNumber();
		hlprint = Dialog.getRadioButton();
		printheader=Dialog.getCheckbox();
		printfooter=Dialog.getCheckbox();
	
	
	if (untilwhen > maximumframe || untilwhen <= 0 || isNaN(untilwhen)) {
	
		untilwhen=maximumframe;
	}
	
	
	brancharray = Array.sort(brancharray);
	
	newbranchlinestring = "";
	
	for (i=0; i<lengthOf(brancharray);++i) {
		branchfields=split(brancharray[i],",");
		lastframeinfields = parseInt(branchfields[2]);
		cusnamefr=branchfields[1];
		cusnamefrarr=split(cusnamefr,"-");
		oriframeinfields=parseInt(cusnamefrarr[1]);
	
		if (oriframeinfields<=untilwhen && lastframeinfields <=untilwhen) {
			newbranchlinestring = newbranchlinestring+brancharray[i]+"\n";	
		}
	
		if (oriframeinfields<=untilwhen && lastframeinfields>untilwhen) {
			newbranchlinestring = newbranchlinestring+branchfields[0]+","+branchfields[1]+","+untilwhen+","+branchfields[3]+"\n";
	
		}
		
	}
	
	brancharray=split(newbranchlinestring,"\n");
	
	firstbranchmembers = split(brancharray[0], ",");
	firstrealname = firstbranchmembers[0];
	firstcusname = firstbranchmembers[1];
	treename = firstrealname;
	treesarray = newArray();
	origin = 0;
	
	for (i=0; i <lengthOf(brancharray); ++i) {
		
		branchmembers = split(brancharray[i], ",");
		realname = branchmembers[0];
		cusname = branchmembers[1];
		if (!startsWith(realname,treename)) {
		treesarray = Array.concat(treesarray,treename,origin,i-1);
		origin = i;
		treename = realname;
		}
		//print (brancharray[i]); 
	}
	
	treesarray = Array.concat(treesarray,treename,origin,i-1);//the last one
	
	
	header ="Sublineage,CustomName,Division,TotalOffs,BiggerOffLin,BiggerOffCusName,BiggerOffs,SmallerOffLin,SmallerOffCusName,SmallerOffs,Color,NextDivisionBigger,NextDivisionSmaller";
	divifilelines = "";
	divifilelines = divifilelines+header+"\n";
	
	for (treesind = 0; treesind < lengthOf(treesarray); treesind = treesind+3) {
		sublineage = treesarray[treesind];
		beginind = treesarray[treesind+1];
		endind = treesarray[treesind+2];
		
		for (outer = beginind; outer <=endind; ++outer){
			outerbranchline = split(brancharray[outer], ",");
			outersublineage = outerbranchline[0];
			outerlastframe = outerbranchline[2];
			outercolor = outerbranchline[3];
			sublineage = outersublineage;
		
		generalct = 0; // counting the number of subranches
		acounter = 0;//counting the number of branches-a
		bcounter = 0;//counting the number of branches-b
		firsta = 0;
		firstb = 0;
		firstsub = 0;
		nama = " ";
		namb = " ";
		namsub = " ";
		custpb = " ";
		custpa = " ";
		nextdiva = " ";
		nextdivb = " ";
		
		for (k=beginind; k<=endind; ++k) {//going through one sublineage
	
			branchline = split(brancharray[k], ",");
			currentname = branchline[0];
			currentcusname = branchline[1];
			currentendframe = branchline[2];
			
			if (startsWith(currentname,sublineage)) {
				generalct = generalct+1;
				if (firstsub == 0){
				namsub = currentcusname;
				firstsub = 1;	
				}
			}
	
			if (startsWith(currentname,sublineage+"a") || startsWith(currentname,sublineage+"1") || startsWith(currentname,sublineage+"A") || startsWith(currentname,sublineage+"C")) {
				acounter = acounter+1;
				if (firsta == 0){
				nextdiva = parseInt(currentendframe);
				oriframearr = split(currentcusname,"-");
				oriframea = oriframearr[1];
				if (outerlastframe!=maximumframe && oriframea!=(1+outerlastframe)){
					print ("WEIRD: "+sublineage+" or "+namsub+" Division at "+outerlastframe+" First frame of daughter "+oriframea);
				}
				nama = currentname;
				custpa = currentcusname;
				firsta = 1;	
				}
				
			}
	
			if (startsWith(currentname,sublineage+"b") || startsWith(currentname,sublineage+"2") || startsWith(currentname,sublineage+"B") || startsWith(currentname,sublineage+"D")) {
				bcounter = bcounter+1;
				
				if (firstb == 0){
				namb = currentname;
				custpb = currentcusname;
				nextdivb = parseInt(currentendframe);
				firstb = 1;	
				}
			}
		
		}// end for going through one sublineage = k
	
		if (hlprint == "HL tree" && bcounter>acounter) {
		tobeprinted = sublineage+","+namsub+","+outerlastframe+","+generalct-1+","+namb+","+custpb+","+bcounter+","+nama+","+custpa+","+acounter+","+outercolor+","+nextdivb+","+nextdiva;
		} 
		else {
		tobeprinted = sublineage+","+namsub+","+outerlastframe+","+generalct-1+","+nama+","+custpa+","+acounter+","+namb+","+custpb+","+bcounter+","+outercolor+","+nextdiva+","+nextdivb;
		}
		
		if (hlprint == "HL tree" && bcounter==acounter ) {
			if (nextdiva>nextdivb) {
			tobeprinted = sublineage+","+namsub+","+outerlastframe+","+generalct-1+","+namb+","+custpb+","+bcounter+","+nama+","+custpa+","+acounter+","+outercolor+","+nextdivb+","+nextdiva;
			} else {
			tobeprinted = sublineage+","+namsub+","+outerlastframe+","+generalct-1+","+nama+","+custpa+","+acounter+","+namb+","+custpb+","+bcounter+","+outercolor+","+nextdiva+","+nextdivb;
			}
			}
	
		divifilelines = divifilelines+tobeprinted+"\n";
		custpa = " ";
		custpb = " ";
		}//end of outer
	
	}//end for going through the indexed treesarray
	
	//print (divifilelines);
	
	
	////The tree drawing part
	
	lines = split(divifilelines, "\n");
	nrlines = lengthOf(lines);
	
	for (i=0;i<lengthOf(lines);++i) {
		print (lines[i]);
	}
	
	
	firstfield = split(lines[1],",");
	firstparent = firstfield[0];
	alltreesarr = newArray();
	firstlinebeg = 1;
	for (outerind = 1; outerind<nrlines; ++outerind) {
		initfields = split(lines[outerind],",");
		if (!startsWith(lines[outerind],firstparent)) {
			alltreesarr = Array.concat(alltreesarr,firstparent+"@"+firstlinebeg+"@"+outerind-1);
			firstparent = initfields[0];
			firstlinebeg = outerind;
		}
		
		if (outerind == nrlines-1) {
		alltreesarr = Array.concat(alltreesarr,firstparent+"@"+firstlinebeg+"@"+outerind);
		}
	}///end for going to see how many trees are there
	
	for (i=0;i<lengthOf(alltreesarr);++i) {
		print (alltreesarr[i]);
	}
	
	
	for (arrind = 0; arrind < lengthOf(alltreesarr); ++arrind) {
		//print (alltreesarr[arrind]);
		alltreesarrfields = split (alltreesarr[arrind],"@");
		firstparent = alltreesarrfields[0];
		choppedfirstparent=chop(firstparent);
		begline = alltreesarrfields[1];
		endline = alltreesarrfields[2];
		//print (lines[begline]);
		//print (lines[endline]);
		firstline = lines[begline];
		firstfield = split(firstline,",");
		firstcusname = firstfield[1];
		print ("Processing tree "+firstparent);
		///begin of the core
		treesarr = newArray();
		branches = parseInt(firstfield[3]);
		treesize = 1+branches/2;
		//framefactor = 1;
		framenr = maximumframe;
		widthfactor = 10;
		heightfactor = 20;
		linewidth = 1.5;
		colour = "white";
		middley = treesize*heightfactor/2;
		svgchain = "";
		//heightfactor*(1+smallersize)/4;
		offsetx = 30;
		offsety = 30;
		firstchain = firstparent+","+offsetx+","+middley+offsety;
		todoarr = newArray();
		todoarr = Array.concat(todoarr,firstchain);
		//print ("TREESIZE: "+treesize);
	
		svgchain = svgchain+"<svg height=\""+treesize*heightfactor+2*offsety+"\" width=\""+framenr*framefactor*widthfactor+3*offsetx+40+"\" xmlns=\"http://www.w3.org/2000/svg\">\n";
		if (printheader==1) {
		svgchain = svgchain+"<text x=\""+30+"\" y=\""+15+"\" font-style = \"italic\" font-size = \"12\" fill=\"black\">Lineage: "+firstparent+"  Identifier: "+firstcusname+"  Treesize: "+treesize+"  Frames: 1-"+untilwhen+"/"+maximumframe+"</text>\n";
		}
		if (printfooter==1) {
		svgchain = svgchain+"<text x=\""+30+"\" y=\""+treesize*heightfactor+2*offsety-5+"\" font-style = \"italic\" font-size = \"12\" fill=\"black\">Created: "+datestring+"  from file: "+filname+"</text>\n";
		}
		svgchain = svgchain+"<text x=\""+offsetx+3+"\" y=\""+middley+offsety-15+"\" font-size = \"12\" fill=\"black\">"+choppedfirstparent+"</text>\n";
	for (i=begline; i<=endline; ++i) {
		fields = split(lines[i],",");
		urparent = fields[0];
		cusname = fields[1];
		linaddition = substring(urparent,lengthOf(urparent)-1);
		branchend = parseInt(fields[2]);
		branchsize = parseInt(fields[3]);
		biggeroff = fields[4];
		biggeroffcus = fields[5];
		biggersize = parseInt(fields[6]);
		smalleroff = fields[7];
		smalleroffcus = fields[8];
		smallersize = parseInt(fields[9]);
		if (lengthOf(fields)>10){
			colour=fields[10];
		}
		cusori = split(fields[1],"-");
		purecusname=cusori[0];
		origin = 0;
		length = 0;
		if (lengthOf(cusori)>1) {
			origin = cusori[1];
		}
	
		for (inner = 0; inner<lengthOf(todoarr); ++inner) {
			
			arrline = todoarr[inner];
			if (startsWith(arrline, urparent+",")) {
				arrfields = split(arrline,",");	
				prevx = parseInt(arrfields[1]);
				prevy = parseInt(arrfields[2]);
			}		
		}
	
		
		biggerstarty1 = prevy+heightfactor*(1+smallersize)/4;
		smallerstarty1 = prevy-heightfactor*(1+biggersize)/4;
		bothstartx1 = prevx+(1+branchend-origin)*widthfactor*framefactor;
		todoarr = Array.concat(todoarr,fields[4]+","+bothstartx1+","+biggerstarty1,fields[7]+","+bothstartx1+","+smallerstarty1);
		
		if (colour == "white") {
			colour="black";
		}
	
		shift=0;
		svgchain = svgchain+"<line x1=\""+prevx+shift+"\" y1=\""+prevy+shift+"\" x2=\""+bothstartx1+shift+"\" y2=\""+prevy+shift+"\" style=\"stroke:"+colour+";stroke-width:"+linewidth+"\"/>\n";
	
	
		if (fields[4] != " ") {
			svgchain = svgchain+"<line x1=\""+bothstartx1+shift+"\" y1=\""+biggerstarty1+shift+"\" x2=\""+bothstartx1+shift+"\" y2=\""+smallerstarty1+shift+"\" style=\"stroke:"+colour+";stroke-width:"+linewidth+"\"/>\n";
			svgchain = svgchain+"<text x=\""+prevx+3+shift+"\" y=\""+prevy-2+shift+"\" font-size = \"12\" fill=\""+colour+"\">"+purecusname+" : "+linaddition+"</text>\n";
			svgchain = svgchain+"<text x=\""+prevx+3+shift+"\" y=\""+prevy+15+shift+"\" font-size = \"12\" fill=\""+colour+"\">"+origin+"</text>\n";
	
		}
	
		if (fields[4] == " ") {
			svgchain = svgchain+"<text x=\""+bothstartx1+5+shift+"\" y=\""+prevy+5+shift+"\" font-size = \"12\" fill=\""+colour+"\">"+cusname+" : "+linaddition+"</text>\n";
		}
	
	}//end for
	
	svgchain = svgchain+"</svg>";
	
	print ("Deleting a previous .svg file with the same name:");
	File.delete(path+"Tree_"+firstparent+"_"+firstcusname+"_"+shortfilname+".svg");
	svgfile = File.open(path+"Tree_"+firstparent+"_"+firstcusname+"_"+shortfilname+".svg");
	print(svgfile,svgchain);
	File.close(svgfile);
	/// end of the core
	
	progressind = (1+arrind)/lengthOf(alltreesarr);
	showStatus("Drawing tree "+firstcusname+"-"+firstparent+" ("+(arrind+1)+"/"+lengthOf(alltreesarr)+")");
	showProgress(progressind);
	
	}//end for arrind;
	showStatus("DONE - Number of trees in the file: "+lengthOf(alltreesarr));
	print ("Number of trees in the file: "+lengthOf(alltreesarr));
	print ("Maximum frame: "+maximumframe);

}//###### End of macro "Draw tree"

macro "Save Colored Track Action Tool - C00f7T0807ST4807aT8807vTc807eT0f07CT6f07lT9f07rTcf07g" {//11AT7 - th A is the one,
	decision = getBoolean("Saving the current coloring can take up to several minutes. \nThe image window will disappear and come back after the saving is finished. \nYou can follow the progress in the FIJI main menu.\n \nDo you want to continue?");
	
	if (decision == 1) {
		setBatchMode(true);
		setBatchMode("hide");
		oversize = Overlay.size;
		savechain = "";
		Coloredfile = File.open(""); 
		setBatchMode(true);
		saveDir = getDirectory("image");
		prevname = "";
	
		if (Coloredfile != "") {
			for (i = 0; i<oversize; i = ++i) {
				Overlay.activateSelection(i);
				selectedcellwithframe = getInfo("selection.name");
	
				if (matches(selectedcellwithframe, ".*#.*")) {
					selectedcellarr = split(selectedcellwithframe,"#");
					cellname = selectedcellarr[0];
					cellz=selectedcellarr[1];
					cusname = selectedcellarr[2];
					slice = getSliceNumber();
					getSelectionBounds(x, y, width, height);
					colorcode = Roi.getFillColor;	
	
					if (cellname != prevname) {
						checkbranch = 0;
					}
					
					if (checkbranch ==0) {//extracting the cusname
						namefrarr = split(cusname, "-");
						if (lengthOf(namefrarr) >1){
							cusnamename = namefrarr[0];
						} else { cusnamefr = 1;
							cusnamename = cusname;
						}
						savechain = savechain+"Branch,"+cellname+","+cusnamename+","+cusname+","+colorcode+"\n";
						prevname = cellname;
						checkbranch = 1;
					}
	
		
				savechain = savechain+cellname+","+(x+width/2)+","+(y+height/2)+","+cellz+","+slice+"\n";
				}//end of if matches
			progress = i/oversize;
			showProgress(progress);
			showStatus("Processed: "+i+"/"+oversize);
			}//for in saving it
		
		print(Coloredfile, savechain);
		File.close(Coloredfile);
		}//end if Coloredfile is specified
	
		setBatchMode(false);
		setBatchMode("show");
	}
}//##### End of Macro Tool Saving the coloring


//########### Function definition #############

function arrindex(a, value) {// returns the index of an item you look for in an array
     for (i=0; i<a.length; i++)
         if (a[i]==value) return i;
     return -1;
}

 

function chop (string) {//like chop in perl
		if ((lengthOf(string)-1) >0) {
		chopped = substring(string,0,(lengthOf(string)-1));
		} else {
			chopped = "";
		}
		return chopped;
}

//defining function lowerof to look for the first index of two possible characters
function lowerof(chain, val1, val2) {
	val2in = 100;
	val1in = 100;
		
	if (indexOf(chain, val1) > -1) {
		val1in = indexOf(chain,val1);
	}
	if (indexOf(chain, val2) > -1) {
		val2in = indexOf(chain,val2);
	}
	return minOf (val1in, val2in);
}

function crDateString() {//returns a string in the like: 2014-07-25 at 11:18:23 
	getDateAndTime(year, month, dayOfWeek, dayOfMonth, hour, minute, second, msec);
	dateString = ""+year+"-";
	
	if (month<10) {
		dateString = dateString+"0";
	}
	dateString = dateString+month+"-";
	
	if (dayOfMonth<10) {
		dateString = dateString+"0";
	}
	dateString=dateString+dayOfMonth+" at ";
	
	if (hour<10) {
		dateString = dateString+"0";
	}
	dateString = dateString+hour+":";
	
	if (minute<10) {
		dateString = dateString+"0";
	}
	dateString = dateString+minute+":";
	
	if (second<10) {
		dateString = dateString+"0";
	}
	dateString = dateString+second;
	
	return dateString;

}
